# Supplementary material
Source: publisher site journal article supplement (https://www.spandidos-publications.com/598/downloadSupplementary)
Supplement: Supplementary file 1 [file downloadSupplementary]

## Sheet: Patient tumor expression
Table SV. Gene expression in ESCC patient tissues.
gene_id	gene	locus	After-radiotherapy	Relapse	status	value_1	value_2	log2(fold_change)	test_stat	p_value	q_value	significant
ENSG00000005381	MPO	17:58269855-58280935	q1	q2	OK	0.952764	0	-1000	#NAME?	0.00085	0.0353833	yes
ENSG00000089169	RPH3A	12:112570379-112898881	q1	q2	OK	2.83818	0	-1000	#NAME?	5e-05	0.00542372	yes
ENSG00000101203	COL20A1	20:63293185-63334851	q1	q2	OK	0.389315	0	-1000	#NAME?	0.0004	0.0233114	yes
ENSG00000137077	CCL21	9:34709004-34710124	q1	q2	OK	12.4391	0	-1000	#NAME?	0.0004	0.0233114	yes
ENSG00000140538	NTRK3	15:87859750-88271066	q1	q2	OK	4.17817	0	-1000	#NAME?	5e-05	0.00542372	yes
ENSG00000151834	GABRA2	4:46248426-46475230	q1	q2	OK	19.0533	0	-1000	#NAME?	5e-05	0.00542372	yes
ENSG00000152208	GRID2	4:92297250-93774556	q1	q2	OK	0.387795	0	-1000	#NAME?	5e-05	0.00542372	yes
ENSG00000153237	CCDC148	2:158166649-158456753	q1	q2	OK	11.7269	0	-1000	#NAME?	0.0002	0.0154802	yes
ENSG00000157890	MEGF11	15:65895078-66253747	q1	q2	OK	1.68207	0	-1000	#NAME?	5e-05	0.00542372	yes
ENSG00000158528	PPP1R9A	7:94907201-95296415	q1	q2	OK	0.44752	0	-1000	#NAME?	0.00065	0.0304721	yes
ENSG00000163046	ANKRD30BL	2:132147590-132257969	q1	q2	OK	2.72141	0	-1000	#NAME?	0.0003	0.0196401	yes
ENSG00000167751	KLK2	19:50861567-50880567	q1	q2	OK	1.63337	0	-1000	#NAME?	5e-05	0.00542372	yes
ENSG00000182836	PLCXD3	5:41306953-41510628	q1	q2	OK	0.837878	0	-1000	#NAME?	0.00095	0.036958	yes
ENSG00000205456	TP53TG3D	16:32250619-32255922	q1	q2	OK	1.24317	0	-1000	#NAME?	0.0012	0.0423591	yes
ENSG00000212769	HMGN2P8	10:84081428-84081995	q1	q2	OK	98.4322	0	-1000	#NAME?	0.00065	0.0304721	yes
ENSG00000214892	USP8P1	6:31275571-31278754	q1	q2	OK	6.00389	0	-1000	#NAME?	0.00055	0.0272452	yes
ENSG00000215296	TMCO5B	15:33235551-33247621	q1	q2	OK	7.93898	0	-1000	#NAME?	0.00065	0.0304721	yes
ENSG00000227195	MIR663AHG	20:26186919-26251526	q1	q2	OK	4.09082	0	-1000	#NAME?	5e-05	0.00542372	yes
ENSG00000228262	LINC01320	2:34677554-34738231	q1	q2	OK	4.78207	0	-1000	#NAME?	5e-05	0.00542372	yes
ENSG00000235289	BRD7P6	2:70353009-70355915	q1	q2	OK	11.617	0	-1000	#NAME?	5e-05	0.00542372	yes
ENSG00000239839	DEFA3	8:6996765-7018301	q1	q2	OK	41.7595	0	-1000	#NAME?	0.00095	0.036958	yes
ENSG00000196586	MYO6	6:75749191-75919537	q1	q2	OK	9950.27	1.59894	-12.6034	-1.48914	0.00035	0.021763	yes
ENSG00000180376	CCDC66	3:56557160-56683237	q1	q2	OK	1723.88	0.519189	-11.6971	-2.24926	5e-05	0.00542372	yes
ENSG00000108848	LUC7L3	17:50719543-50756213	q1	q2	OK	32028.6	11.9132	-11.3926	-1.77554	5e-05	0.00542372	yes
ENSG00000179915	NRXN1	2:49918504-52407917	q1	q2	OK	4.74467	0.00186179	-11.3154	-0.0597822	0.0003	0.0196401	yes
ENSG00000076108	BAZ2A	12:56521928-56636816	q1	q2	OK	6952.32	2.79551	-11.2802	-2.55357	5e-05	0.00542372	yes
ENSG00000106344	RBM28	7:128297684-128343908	q1	q2	OK	3644.63	2.01248	-10.8226	-3.45087	0.00065	0.0304721	yes
ENSG00000131051	RBM39	20:35703608-35742312	q1	q2	OK	33412.8	18.5152	-10.8175	-2.2201	5e-05	0.00542372	yes
ENSG00000060339	CCAR1	10:68721011-68792377	q1	q2	OK	10978.8	7.19122	-10.5762	-1.99636	5e-05	0.00542372	yes
ENSG00000198399	ITSN2	2:24202863-24360714	q1	q2	OK	3001.01	2.0312	-10.5289	-2.05372	0.0002	0.0154802	yes
ENSG00000153914	SREK1	5:66139970-66183615	q1	q2	OK	5974.35	4.07115	-10.5191	-2.08162	0.00045	0.0244068	yes
ENSG00000116754	SRSF11	1:70205681-70253052	q1	q2	OK	18728.6	17.6886	-10.0482	-1.96487	5e-05	0.00542372	yes
ENSG00000204120	GIGYF2	2:232697298-233015885	q1	q2	OK	1139.81	1.17219	-9.92537	-2.05193	5e-05	0.00542372	yes
ENSG00000085276	MECOM	3:169083498-169663618	q1	q2	OK	100.53	0.104997	-9.90305	-1.86693	0.00025	0.0176917	yes
ENSG00000174720	LARP7	4:112513515-112657592	q1	q2	OK	4829.32	5.11402	-9.88315	-2.41135	5e-05	0.00542372	yes
ENSG00000111142	METAP2	12:95473519-95515839	q1	q2	OK	11080.8	13.8795	-9.64089	-2.56118	5e-05	0.00542372	yes
ENSG00000132424	PNISR	6:99398050-99431373	q1	q2	OK	2747.23	3.93385	-9.44782	-1.62209	0.0003	0.0196401	yes
ENSG00000159335	PTMS	12:6747995-6770952	q1	q2	OK	10722	15.6985	-9.41573	-2.19637	0.00075	0.0334707	yes
ENSG00000169062	UPF3A	13:114281583-114305817	q1	q2	OK	2356.77	3.50791	-9.39198	-3.11444	5e-05	0.00542372	yes
ENSG00000008128	CDK11A	1:1702729-1745992	q1	q2	OK	2014.46	3.08533	-9.35075	-2.8517	5e-05	0.00542372	yes
ENSG00000058272	PPP1R12A	12:79574978-79942712	q1	q2	OK	4869.56	8.75157	-9.12003	-2.30407	5e-05	0.00542372	yes
ENSG00000160818	GPATCH4	1:156594486-156601496	q1	q2	OK	1945.57	3.84218	-8.98405	-2.90146	0.0008	0.0345605	yes
ENSG00000081189	MEF2C	5:88507545-89466398	q1	q2	OK	179.866	0.425653	-8.72303	-3.01836	5e-05	0.00542372	yes
ENSG00000118194	TNNT2	1:201359007-201401190	q1	q2	OK	1077.9	2.67275	-8.65568	-1.05002	5e-05	0.00542372	yes
ENSG00000130856	ZNF236	18:76822606-76970727	q1	q2	OK	77.1462	0.199616	-8.59423	-3.29493	0.0014	0.047071	yes
ENSG00000182985	CADM1	11:115169217-115504957	q1	q2	OK	19.2239	0.0502021	-8.58094	-1.12468	5e-05	0.00542372	yes
ENSG00000183117	CSMD1	8:2935352-4994972	q1	q2	OK	0.446821	0.00116735	-8.58031	-0.0185291	0.0015	0.0489923	yes
ENSG00000234545	FAM133B	7:92560792-92590394	q1	q2	OK	2031.53	5.64994	-8.49012	-2.50534	5e-05	0.00542372	yes
ENSG00000136153	LMO7	13:75549479-75859870	q1	q2	OK	1406.48	3.97161	-8.46815	-2.90108	0.0006	0.0290443	yes
ENSG00000273559	CWC25	17:38800433-38825481	q1	q2	OK	563.151	1.7093	-8.36397	-3.38585	0.00025	0.0176917	yes
ENSG00000166598	HSP90B1	12:103841450-103965708	q1	q2	OK	9672.96	31.5357	-8.26083	-1.30333	5e-05	0.00542372	yes
ENSG00000206530	CFAP44	3:113211002-113441610	q1	q2	OK	93.4372	0.305581	-8.2563	-2.3114	0.00085	0.0353833	yes
ENSG00000187109	NAP1L1	12:76036586-76085033	q1	q2	OK	4671.06	15.4562	-8.23942	-2.41662	0.00065	0.0304721	yes
ENSG00000125676	THOC2	X:123600560-123733056	q1	q2	OK	2640.44	8.82536	-8.22491	-1.47838	5e-05	0.00542372	yes
ENSG00000127483	HP1BP3	1:20742660-20787323	q1	q2	OK	2184.15	7.51917	-8.18228	-2.76056	0.0002	0.0154802	yes
ENSG00000132780	NASP	1:45583845-45618904	q1	q2	OK	3000.8	10.4441	-8.16652	-2.84217	5e-05	0.00542372	yes
ENSG00000130396	MLLT4	6:167826921-167972023	q1	q2	OK	2500.8	8.89227	-8.13562	-2.31889	0.0005	0.0258003	yes
ENSG00000162086	ZNF75A	16:3263742-3318852	q1	q2	OK	231.91	0.836824	-8.11443	-2.22821	0.00025	0.0176917	yes
ENSG00000006125	AP2B1	17:35574794-35868891	q1	q2	OK	693.826	2.55656	-8.08423	-0.260005	0.0011	0.0401649	yes
ENSG00000054267	ARID4B	1:235131182-235344532	q1	q2	OK	696.43	2.59978	-8.06545	-2.08532	0.00065	0.0304721	yes
ENSG00000143793	C1orf35	1:228100725-228105411	q1	q2	OK	867.348	3.31157	-8.03295	-3.09766	0.0013	0.0445145	yes
ENSG00000121236	TRIM6	11:5248082-5645789	q1	q2	OK	94.3396	0.360441	-8.03196	-2.9621	0.00055	0.0272452	yes
ENSG00000148516	ZEB1	10:31187882-31529814	q1	q2	OK	67.3115	0.263144	-7.99886	-2.80298	5e-05	0.00542372	yes
ENSG00000147419	CCDC25	8:27733310-27838095	q1	q2	OK	1476.48	5.85936	-7.97721	-2.93754	0.00115	0.0410821	yes
ENSG00000133226	SRRM1	1:24631715-24673267	q1	q2	OK	950.548	3.80688	-7.96401	-1.95759	5e-05	0.00542372	yes
ENSG00000104731	KLHDC4	16:87600525-87765992	q1	q2	OK	366.354	1.64875	-7.79572	-3.14626	0.0001	0.00984172	yes
ENSG00000131503	ANKHD1	5:140401813-140593752	q1	q2	OK	691.397	3.20956	-7.751	-1.83466	0.00105	0.0391079	yes
ENSG00000141002	TCF25	16:89873585-89938761	q1	q2	OK	1813.31	8.47292	-7.74155	-2.71962	0.001	0.0380077	yes
ENSG00000049540	ELN	7:74027788-74069907	q1	q2	OK	27.9774	0.132932	-7.71743	-1.67678	0.0005	0.0258003	yes
ENSG00000077380	DYNC1I2	2:171687408-171748420	q1	q2	OK	3084.13	14.8572	-7.69755	-2.6078	0.0001	0.00984172	yes
ENSG00000082805	ERC1	12:912076-1495933	q1	q2	OK	187.346	0.906979	-7.69042	-3.38682	0.0005	0.0258003	yes
ENSG00000029363	BCLAF1	6:136256862-136289851	q1	q2	OK	1251.01	6.28532	-7.63689	-2.61894	5e-05	0.00542372	yes
ENSG00000182196	ARL6IP4	12:122920950-122982913	q1	q2	OK	2383.52	12.204	-7.60959	-2.57032	0.0003	0.0196401	yes
ENSG00000182670	TTC3	21:37073225-37203112	q1	q2	OK	574.542	3.03824	-7.56303	-2.31768	0.00025	0.0176917	yes
ENSG00000165525	NEMF	14:49767607-49853203	q1	q2	OK	1683.87	8.9238	-7.55991	-1.5855	5e-05	0.00542372	yes
ENSG00000188529	SRSF10	1:23964803-23980927	q1	q2	OK	879.269	4.77004	-7.52616	-3.13837	0.0011	0.0401649	yes
ENSG00000115211	EIF2B4	2:27325848-27370486	q1	q2	OK	489.777	2.7761	-7.46292	-2.32818	0.00105	0.0391079	yes
ENSG00000131871	VIMP	15:101270816-101277500	q1	q2	OK	633.124	3.70496	-7.41689	-3.34705	0.00045	0.0244068	yes
ENSG00000177106	EPS8L2	11:644232-727727	q1	q2	OK	809.8	4.90509	-7.36714	-2.83096	0.00085	0.0353833	yes
ENSG00000122483	CCDC18	1:93149741-93369498	q1	q2	OK	73.9646	0.454848	-7.3453	-1.06674	0.0008	0.0345605	yes
ENSG00000130413	STK33	11:8391867-8594289	q1	q2	OK	2.85565	0.017997	-7.30992	-0.556713	0.0012	0.0423591	yes
ENSG00000170949	ZNF160	19:53066605-53103436	q1	q2	OK	22.7232	0.144992	-7.29205	-1.97321	0.00145	0.0482068	yes
ENSG00000137776	SLTM	15:58771191-59097419	q1	q2	OK	621.375	4.10512	-7.2419	-1.91602	5e-05	0.00542372	yes
ENSG00000133142	TCEAL4	X:103576230-103587736	q1	q2	OK	1586.44	10.9133	-7.18357	-2.96349	0.00055	0.0272452	yes
ENSG00000078114	NEBL	10:20779972-21175048	q1	q2	OK	174.238	1.22653	-7.15033	-2.00076	0.0014	0.047071	yes
ENSG00000122786	CALD1	7:134744251-134970728	q1	q2	OK	1640.27	11.6789	-7.13389	-1.29186	0.00015	0.0125941	yes
ENSG00000105821	DNAJC2	7:103297421-103989516	q1	q2	OK	879.406	6.9649	-6.98028	-2.06547	0.0015	0.0489923	yes
ENSG00000111554	MDM1	12:68272442-68332381	q1	q2	OK	33.0408	0.288221	-6.84093	-2.9796	0.00065	0.0304721	yes
ENSG00000113658	SMAD5	5:136129506-136188747	q1	q2	OK	115.198	1.01164	-6.83127	-2.56053	0.0004	0.0233114	yes
ENSG00000080503	SMARCA2	9:2015218-2193624	q1	q2	OK	238.197	2.35815	-6.65836	-2.4603	5e-05	0.00542372	yes
ENSG00000215252	GOLGA8B	15:34525206-34588503	q1	q2	OK	126.859	1.31065	-6.5968	-2.39606	0.001	0.0380077	yes
ENSG00000123636	BAZ2B	2:159318978-159617082	q1	q2	OK	337.394	3.81256	-6.46753	-1.0753	0.0011	0.0401649	yes
ENSG00000139734	DIAPH3	13:59665582-60163987	q1	q2	OK	24.5511	0.279529	-6.45665	-3.29353	0.00055	0.0272452	yes
ENSG00000114439	BBX	3:107522935-107811324	q1	q2	OK	159.629	1.83678	-6.44139	-1.59704	5e-05	0.00542372	yes
ENSG00000123352	SPATS2	12:49366583-49527424	q1	q2	OK	116.507	1.37752	-6.4022	-3.1732	0.00075	0.0334707	yes
ENSG00000105963	ADAP1	7:897900-975599	q1	q2	OK	31.5729	0.385068	-6.35743	-1.67769	0.0013	0.0445145	yes
ENSG00000174243	DDX23	12:48829763-48852842	q1	q2	OK	194.246	2.38129	-6.35	-2.87245	0.00055	0.0272452	yes
ENSG00000113649	TCERG1	5:146447310-146511961	q1	q2	OK	182.226	2.30745	-6.30328	-2.21223	0.00055	0.0272452	yes
ENSG00000112419	PHACTR2	6:143536844-143938471	q1	q2	OK	66.4206	0.980974	-6.08127	-1.35118	0.00025	0.0176917	yes
ENSG00000079308	TNS1	2:217799788-218002995	q1	q2	OK	24.2889	0.360133	-6.07562	-2.26479	0.001	0.0380077	yes
ENSG00000165671	NSD1	5:177133024-177300215	q1	q2	OK	51.5095	0.806158	-5.99763	-2.48285	0.0015	0.0489923	yes
ENSG00000100065	CARD10	22:37490361-37519542	q1	q2	OK	75.5547	1.21646	-5.95676	-2.85798	0.0007	0.0324072	yes
ENSG00000067066	SP100	2:230415941-230580006	q1	q2	OK	264.778	4.48299	-5.88418	-1.40421	0.00015	0.0125941	yes
ENSG00000174373	RALGAPA1	14:35538351-35809304	q1	q2	OK	75.4716	1.29816	-5.86139	-2.68236	0.0006	0.0290443	yes
ENSG00000204209	DAXX	6:33318557-33329269	q1	q2	OK	125.137	2.1617	-5.85519	-2.9121	0.00055	0.0272452	yes
ENSG00000100813	ACIN1	14:23058563-23100462	q1	q2	OK	598.497	11.2831	-5.72911	-1.21361	0.0004	0.0233114	yes
ENSG00000165269	AQP7	9:33383178-33402682	q1	q2	OK	1.44453	0.0283232	-5.67247	-0.522778	0.0008	0.0345605	yes
ENSG00000089335	ZNF302	19:34677638-34686397	q1	q2	OK	94.0516	1.88248	-5.64275	-2.77027	0.0009	0.0364439	yes
ENSG00000169057	MECP2	X:154021572-154137103	q1	q2	OK	183.144	4.47829	-5.35389	-1.38001	0.0008	0.0345605	yes
ENSG00000106012	IQCE	7:2558971-2614734	q1	q2	OK	15.3527	0.376647	-5.34913	-2.29248	0.0015	0.0489923	yes
ENSG00000135945	REV1	2:98997260-99490035	q1	q2	OK	54.4811	1.50986	-5.17327	-0.0974819	0.0008	0.0345605	yes
ENSG00000169554	ZEB2	2:144384080-144524583	q1	q2	OK	16.4428	0.507937	-5.01666	-2.05167	0.0007	0.0324072	yes
ENSG00000082397	EPB41L3	18:5392380-5630700	q1	q2	OK	5.32363	0.170665	-4.96317	-1.16979	0.0014	0.047071	yes
ENSG00000137821	LRRC49	15:70829129-71053657	q1	q2	OK	2.56579	0.0877751	-4.86945	-0.706068	0.00045	0.0244068	yes
ENSG00000204482	LST1	6:31586123-31592985	q1	q2	OK	12.5402	0.429737	-4.86697	-1.2416	0.00085	0.0353833	yes
ENSG00000106829	TLE4	9:79571772-79726882	q1	q2	OK	37.4169	1.53453	-4.60782	-1.78448	0.001	0.0380077	yes
ENSG00000012124	CD22	19:35319260-35347355	q1	q2	OK	0.428969	0.0457907	-3.22775	-0.249236	0.00075	0.0334707	yes
ENSG00000122390	NAA60	16:3365098-3577400	q1	q2	OK	0.149718	1.44072	3.26647	0.61868	0.0003	0.0196401	yes
ENSG00000141380	SS18	18:26016252-26091217	q1	q2	OK	0.263027	2.7165	3.36847	1.28613	0.00105	0.0391079	yes
ENSG00000077782	FGFR1	8:38411137-38468834	q1	q2	OK	0.048615	0.543814	3.48364	0.34333	5e-05	0.00542372	yes
ENSG00000186642	PDE2A	11:72576140-72674591	q1	q2	OK	0.0583242	0.900259	3.94817	0.546006	0.001	0.0380077	yes
ENSG00000140995	DEF8	16:89947924-89968060	q1	q2	OK	0.156307	2.4615	3.97708	1.09677	0.00095	0.036958	yes
ENSG00000072310	SREBF1	17:17681472-17837002	q1	q2	OK	0.280646	4.93812	4.13714	1.06569	0.00015	0.0125941	yes
ENSG00000105983	LMBR1	7:156472195-156893230	q1	q2	OK	0.124029	2.28427	4.20298	1.11268	0.00145	0.0482068	yes
ENSG00000166949	SMAD3	15:67063762-67195195	q1	q2	OK	0.168456	3.15414	4.2268	1.43107	0.00065	0.0304721	yes
ENSG00000185728	YTHDF3	8:63168552-63212786	q1	q2	OK	0.139095	2.67948	4.2678	1.62112	0.00115	0.0410821	yes
ENSG00000177728	TMEM94	17:75441158-75500090	q1	q2	OK	0.0703532	1.71697	4.60911	0.66065	5e-05	0.00542372	yes
ENSG00000123358	NR4A1	12:52022831-52059507	q1	q2	OK	0.0510775	1.37859	4.75436	0.755833	0.0011	0.0401649	yes
ENSG00000140455	USP3	15:63504510-63602428	q1	q2	OK	0.0331872	0.912536	4.78118	0.54242	0.00035	0.021763	yes
ENSG00000135749	PCNXL2	1:232950604-233295727	q1	q2	OK	0.0464384	1.41669	4.93107	0.485035	0.00045	0.0244068	yes
ENSG00000156931	VPS8	3:184812142-185052614	q1	q2	OK	0.0374918	1.16295	4.95507	0.345143	5e-05	0.00542372	yes
ENSG00000073282	TP63	3:189631415-189897279	q1	q2	OK	0.31498	10.4407	5.05082	1.92943	0.00035	0.021763	yes
ENSG00000130821	SLC6A8	X:153669729-153696593	q1	q2	OK	0.237468	8.0409	5.08155	1.7896	0.0013	0.0445145	yes
ENSG00000103034	NDRG4	16:58462845-58513628	q1	q2	OK	0.134919	8.63175	5.99949	1.28345	5e-05	0.00542372	yes
ENSG00000009830	POMT2	14:77274955-77331597	q1	q2	OK	0.0362577	2.50919	6.11279	0.543489	0.0001	0.00984172	yes
ENSG00000187134	AKR1C1	10:4922563-5135226	q1	q2	OK	0.437459	30.6146	6.12892	1.59459	0.00095	0.036958	yes
ENSG00000126883	NUP214	9:131125560-131234670	q1	q2	OK	0.0231502	1.63403	6.14127	0.323786	5e-05	0.00542372	yes
ENSG00000017260	ATP2C1	3:130850594-131381475	q1	q2	OK	0.0750792	5.3298	6.14952	0.930133	0.00095	0.036958	yes
ENSG00000104419	NDRG1	8:133237170-133302022	q1	q2	OK	4.23591	314.321	6.21342	2.32115	0.00015	0.0125941	yes
ENSG00000005882	PDK2	17:50094736-50129882	q1	q2	OK	0	1.29474	inf	#NAME?	0.0003	0.0196401	yes
ENSG00000006210	CX3CL1	16:57372457-57385048	q1	q2	OK	0	0.553128	inf	#NAME?	0.0012	0.0423591	yes
ENSG00000007038	PRSS21	16:2817179-2826304	q1	q2	OK	0	7.29327	inf	#NAME?	0.00015	0.0125941	yes
ENSG00000010219	DYRK4	12:4562203-4851927	q1	q2	OK	0	1.58218	inf	#NAME?	0.001	0.0380077	yes
ENSG00000021300	PLEKHB1	11:73646177-73662819	q1	q2	OK	0	0.36566	inf	#NAME?	5e-05	0.00542372	yes
ENSG00000042088	TDP1	14:89954938-90044768	q1	q2	OK	0	1.51126	inf	#NAME?	5e-05	0.00542372	yes
ENSG00000042317	SPATA7	14:88384923-88554733	q1	q2	OK	0	0.517391	inf	#NAME?	0.0004	0.0233114	yes
ENSG00000046653	GPM6B	X:13771030-13938638	q1	q2	OK	0	0.358697	inf	#NAME?	0.00015	0.0125941	yes
ENSG00000048052	HDAC9	7:18086948-19002416	q1	q2	OK	0	0.778434	inf	#NAME?	5e-05	0.00542372	yes
ENSG00000059573	ALDH18A1	10:95605928-95656706	q1	q2	OK	0	1.29008	inf	#NAME?	0.00045	0.0244068	yes
ENSG00000060069	CTDP1	18:79679800-79756623	q1	q2	OK	0	0.789338	inf	#NAME?	0.0009	0.0364439	yes
ENSG00000060140	STYK1	12:10618938-10674318	q1	q2	OK	0	0.375427	inf	#NAME?	0.001	0.0380077	yes
ENSG00000064545	TMEM161A	19:19119168-19138513	q1	q2	OK	0	1.21803	inf	#NAME?	0.00025	0.0176917	yes
ENSG00000065802	ASB1	2:238426741-238452250	q1	q2	OK	0	1.30418	inf	#NAME?	0.00025	0.0176917	yes
ENSG00000066651	TRMT11	6:125986429-126039276	q1	q2	OK	0	0.718412	inf	#NAME?	0.0001	0.00984172	yes
ENSG00000066827	ZFAT	8:134477787-134713049	q1	q2	OK	0	0.603649	inf	#NAME?	5e-05	0.00542372	yes
ENSG00000066926	FECH	18:57548282-57586772	q1	q2	OK	0	1.36545	inf	#NAME?	0.00025	0.0176917	yes
ENSG00000067365	METTL22	16:8621682-8649654	q1	q2	OK	0	1.8462	inf	#NAME?	5e-05	0.00542372	yes
ENSG00000067606	PRKCZ	1:2050469-2220738	q1	q2	OK	0	1.45128	inf	#NAME?	0.00015	0.0125941	yes
ENSG00000068354	TBC1D25	X:48539456-48562609	q1	q2	OK	0	0.573584	inf	#NAME?	0.0004	0.0233114	yes
ENSG00000070495	JMJD6	17:76712831-76726799	q1	q2	OK	0	2.07434	inf	#NAME?	0.00105	0.0391079	yes
ENSG00000070501	POLB	8:42338453-42371808	q1	q2	OK	0	4.0294	inf	#NAME?	0.00095	0.036958	yes
ENSG00000070729	CNGB1	16:57882339-57971116	q1	q2	OK	0	0.349078	inf	#NAME?	0.00045	0.0244068	yes
ENSG00000073169	SELO	22:50200978-50217616	q1	q2	OK	0	1.38587	inf	#NAME?	0.00045	0.0244068	yes
ENSG00000073417	PDE8A	15:84980439-85139145	q1	q2	OK	0	0.539358	inf	#NAME?	0.00035	0.021763	yes
ENSG00000074047	GLI2	2:120735622-120992653	q1	q2	OK	0	0.346129	inf	#NAME?	5e-05	0.00542372	yes
ENSG00000075234	TTC38	22:46267960-46294008	q1	q2	OK	0	0.518145	inf	#NAME?	0.0008	0.0345605	yes
ENSG00000075336	TIMM21	18:74148510-74160530	q1	q2	OK	0	2.76666	inf	#NAME?	0.00105	0.0391079	yes
ENSG00000076826	CAMSAP3	19:7595901-7618304	q1	q2	OK	0	1.0905	inf	#NAME?	5e-05	0.00542372	yes
ENSG00000076864	RAP1GAP	1:21596214-21669363	q1	q2	OK	0	0.73443	inf	#NAME?	5e-05	0.00542372	yes
ENSG00000077463	SIRT6	19:4174108-4182604	q1	q2	OK	0	1.22283	inf	#NAME?	5e-05	0.00542372	yes
ENSG00000080031	PTPRH	19:55181247-55209506	q1	q2	OK	0	0.670432	inf	#NAME?	0.00095	0.036958	yes
ENSG00000083093	PALB2	16:23603159-23641310	q1	q2	OK	0	0.835172	inf	#NAME?	0.00045	0.0244068	yes
ENSG00000085491	SLC25A24	1:108134035-108202743	q1	q2	OK	0	1.73472	inf	#NAME?	0.00015	0.0125941	yes
ENSG00000085831	TTC39A	1:51287257-51345116	q1	q2	OK	0	0.951786	inf	#NAME?	5e-05	0.00542372	yes
ENSG00000087903	RFX2	19:5978402-6199572	q1	q2	OK	0	0.943202	inf	#NAME?	5e-05	0.00542372	yes
ENSG00000088448	ANKRD10	13:110878539-110915069	q1	q2	OK	0	4.07765	inf	#NAME?	5e-05	0.00542372	yes
ENSG00000088836	SLC4A11	20:3227416-3239190	q1	q2	OK	0	0.416359	inf	#NAME?	0.00035	0.021763	yes
ENSG00000090054	SPTLC1	9:92031998-92115384	q1	q2	OK	0	3.60882	inf	#NAME?	0.0001	0.00984172	yes
ENSG00000092036	HAUS4	14:22929608-22982642	q1	q2	OK	0	3.48176	inf	#NAME?	0.0006	0.0290443	yes
ENSG00000092208	GEMIN2	14:39114222-39136973	q1	q2	OK	0	1.87107	inf	#NAME?	0.00115	0.0410821	yes
ENSG00000094963	FMO2	1:171185207-171227788	q1	q2	OK	0	0.452161	inf	#NAME?	0.00045	0.0244068	yes
ENSG00000099282	TSPAN15	10:69451472-69507669	q1	q2	OK	0	0.783297	inf	#NAME?	0.00075	0.0334707	yes
ENSG00000100311	PDGFB	22:39223358-39244751	q1	q2	OK	0	0.330435	inf	#NAME?	0.00135	0.0459093	yes
ENSG00000100376	FAM118A	22:45308967-45341955	q1	q2	OK	0	0.960474	inf	#NAME?	5e-05	0.00542372	yes
ENSG00000100416	TRMU	22:46330874-46357340	q1	q2	OK	0	1.48768	inf	#NAME?	5e-05	0.00542372	yes
ENSG00000100433	KCNK10	14:88175390-88326907	q1	q2	OK	0	0.372564	inf	#NAME?	0.00015	0.0125941	yes
ENSG00000100445	SDR39U1	14:24426531-24442905	q1	q2	OK	0	6.80163	inf	#NAME?	0.00055	0.0272452	yes
ENSG00000100867	DHRS2	14:23630114-23645639	q1	q2	OK	0	2.00447	inf	#NAME?	0.00055	0.0272452	yes
ENSG00000101247	NDUFAF5	20:13784949-13821582	q1	q2	OK	0	0.528046	inf	#NAME?	0.00045	0.0244068	yes
ENSG00000101493	ZNF516	18:76358189-76495190	q1	q2	OK	0	0.420345	inf	#NAME?	0.00045	0.0244068	yes
ENSG00000102078	SLC25A14	X:130339887-130373361	q1	q2	OK	0	0.720206	inf	#NAME?	0.0005	0.0258003	yes
ENSG00000102312	PORCN	X:48508961-48520814	q1	q2	OK	0	1.2098	inf	#NAME?	0.0001	0.00984172	yes
ENSG00000103066	PLA2G15	16:68245303-68261062	q1	q2	OK	0	0.75227	inf	#NAME?	5e-05	0.00542372	yes
ENSG00000105397	TYK2	19:10350528-10380676	q1	q2	OK	0	5.19611	inf	#NAME?	5e-05	0.00542372	yes
ENSG00000105767	CADM4	19:43622367-43639839	q1	q2	OK	0	2.70789	inf	#NAME?	0.0013	0.0445145	yes
ENSG00000106524	ANKMY2	7:16599775-16645817	q1	q2	OK	0	0.702114	inf	#NAME?	0.00045	0.0244068	yes
ENSG00000108509	CAMTA2	17:4967991-4987652	q1	q2	OK	0	1.85884	inf	#NAME?	0.00125	0.0438119	yes
ENSG00000108591	DRG2	17:18087885-18209954	q1	q2	OK	0	2.37512	inf	#NAME?	0.00065	0.0304721	yes
ENSG00000109339	MAPK10	4:86015122-86594131	q1	q2	OK	0	0.660133	inf	#NAME?	5e-05	0.00542372	yes
ENSG00000109674	NEIL3	4:177309835-177362943	q1	q2	OK	0	0.600485	inf	#NAME?	0.00145	0.0482068	yes
ENSG00000110171	TRIM3	11:6448612-6474459	q1	q2	OK	0	0.494305	inf	#NAME?	0.0007	0.0324072	yes
ENSG00000110660	SLC35F2	11:107790990-107928293	q1	q2	OK	0	0.867547	inf	#NAME?	0.00035	0.021763	yes
ENSG00000111432	FZD10	12:130162458-130165740	q1	q2	OK	0	0.729887	inf	#NAME?	0.00145	0.0482068	yes
ENSG00000111700	SLCO1B3	12:20810701-21239246	q1	q2	OK	0	1.44754	inf	#NAME?	0.0008	0.0345605	yes
ENSG00000111962	UST	6:148747327-149076990	q1	q2	OK	0	1.71099	inf	#NAME?	0.00025	0.0176917	yes
ENSG00000112578	BYSL	6:41921187-41933046	q1	q2	OK	0	0.993181	inf	#NAME?	0.0009	0.0364439	yes
ENSG00000112742	TTK	6:80003886-80042527	q1	q2	OK	0	1.20762	inf	#NAME?	0.0001	0.00984172	yes
ENSG00000112759	SLC29A1	6:44219504-44234151	q1	q2	OK	0	2.44715	inf	#NAME?	0.0002	0.0154802	yes
ENSG00000114107	CEP70	3:138494343-138594538	q1	q2	OK	0	2.0118	inf	#NAME?	5e-05	0.00542372	yes
ENSG00000114200	BCHE	3:165772903-165837472	q1	q2	OK	0	2.36126	inf	#NAME?	0.00025	0.0176917	yes
ENSG00000114480	GBE1	3:81489698-81762161	q1	q2	OK	0	1.08462	inf	#NAME?	0.00015	0.0125941	yes
ENSG00000114491	UMPS	3:124730365-124749273	q1	q2	OK	0	2.66399	inf	#NAME?	0.0007	0.0324072	yes
ENSG00000115107	STEAP3	2:119223830-119265652	q1	q2	OK	0	2.30431	inf	#NAME?	5e-05	0.00542372	yes
ENSG00000115145	STAM2	2:152116800-152175992	q1	q2	OK	0	1.66862	inf	#NAME?	5e-05	0.00542372	yes
ENSG00000115525	ST3GAL5	2:85839143-85889014	q1	q2	OK	0	0.763524	inf	#NAME?	5e-05	0.00542372	yes
ENSG00000117543	DPH5	1:100989622-101087268	q1	q2	OK	0	1.59032	inf	#NAME?	0.00015	0.0125941	yes
ENSG00000117616	RSRP1	1:25242236-25430192	q1	q2	OK	0	4.09341	inf	#NAME?	5e-05	0.00542372	yes
ENSG00000118495	PLAGL1	6:143940299-144064599	q1	q2	OK	0	2.17154	inf	#NAME?	5e-05	0.00542372	yes
ENSG00000118961	LDAH	2:20684013-20823130	q1	q2	OK	0	0.614611	inf	#NAME?	0.00085	0.0353833	yes
ENSG00000119125	GDA	9:72114594-72257193	q1	q2	OK	0	0.486699	inf	#NAME?	5e-05	0.00542372	yes
ENSG00000119682	AREL1	14:74653436-74713115	q1	q2	OK	0	1.31884	inf	#NAME?	0.0002	0.0154802	yes
ENSG00000119698	PPP4R4	14:94146127-94279735	q1	q2	OK	0	0.890184	inf	#NAME?	0.00015	0.0125941	yes
ENSG00000120254	MTHFD1L	6:150865548-151228447	q1	q2	OK	0	2.22717	inf	#NAME?	5e-05	0.00542372	yes
ENSG00000120370	GORAB	1:170460452-170553446	q1	q2	OK	0	0.629195	inf	#NAME?	0.00075	0.0334707	yes
ENSG00000120662	MTRF1	13:41132938-41263577	q1	q2	OK	0	0.694105	inf	#NAME?	0.00115	0.0410821	yes
ENSG00000120756	PLS1	3:142596386-142713664	q1	q2	OK	0	1.21002	inf	#NAME?	5e-05	0.00542372	yes
ENSG00000121152	NCAPH	2:96335786-96373845	q1	q2	OK	0	2.03772	inf	#NAME?	5e-05	0.00542372	yes
ENSG00000121211	MND1	4:153344648-153415118	q1	q2	OK	0	1.39169	inf	#NAME?	0.0002	0.0154802	yes
ENSG00000121417	ZNF211	19:57630394-57642779	q1	q2	OK	0	0.452926	inf	#NAME?	0.00115	0.0410821	yes
ENSG00000122507	BBS9	7:33129243-33606068	q1	q2	OK	0	0.435996	inf	#NAME?	5e-05	0.00542372	yes
ENSG00000123643	SLC36A1	5:151437045-151492381	q1	q2	OK	0	0.481368	inf	#NAME?	0.0003	0.0196401	yes
ENSG00000124143	ARHGAP40	20:38601933-38651035	q1	q2	OK	0	0.54308	inf	#NAME?	0.00085	0.0353833	yes
ENSG00000124641	MED20	6:41905353-41921139	q1	q2	OK	0	1.3289	inf	#NAME?	5e-05	0.00542372	yes
ENSG00000125447	GGA3	17:75236598-75271227	q1	q2	OK	0	1.47377	inf	#NAME?	0.0003	0.0196401	yes
ENSG00000126953	TIMM8A	X:101345660-101349196	q1	q2	OK	0	0.82737	inf	#NAME?	0.0015	0.0489923	yes
ENSG00000127418	FGFRL1	4:1009935-1026897	q1	q2	OK	0	0.395782	inf	#NAME?	0.0006	0.0290443	yes
ENSG00000128513	POT1	7:124822385-125379321	q1	q2	OK	0	1.11184	inf	#NAME?	0.00035	0.021763	yes
ENSG00000128683	GAD1	2:170813212-170861151	q1	q2	OK	0	0.374917	inf	#NAME?	0.00065	0.0304721	yes
ENSG00000129158	SERGEF	11:17788047-18042426	q1	q2	OK	0	1.87001	inf	#NAME?	0.00095	0.036958	yes
ENSG00000130589	HELZ2	20:63558085-63574239	q1	q2	OK	0	1.91868	inf	#NAME?	5e-05	0.00542372	yes
ENSG00000130803	ZNF317	19:9140379-9163424	q1	q2	OK	0	1.51672	inf	#NAME?	0.00015	0.0125941	yes
ENSG00000130822	PNCK	X:153669729-153696593	q1	q2	OK	0	1.24992	inf	#NAME?	5e-05	0.00542372	yes
ENSG00000131196	NFATC1	18:79395855-79529325	q1	q2	OK	0	0.713623	inf	#NAME?	0.00045	0.0244068	yes
ENSG00000131931	THAP1	8:42836673-42843325	q1	q2	OK	0	0.722404	inf	#NAME?	0.0009	0.0364439	yes
ENSG00000132164	SLC6A11	3:10816199-10940733	q1	q2	OK	0	0.373491	inf	#NAME?	0.0006	0.0290443	yes
ENSG00000132326	PER2	2:238231683-238290102	q1	q2	OK	0	0.405388	inf	#NAME?	0.0013	0.0445145	yes
ENSG00000132541	HRSP12	8:98102343-98117241	q1	q2	OK	0	2.49295	inf	#NAME?	0.0009	0.0364439	yes
ENSG00000132906	CASP9	1:15456727-15526534	q1	q2	OK	0	0.613539	inf	#NAME?	0.0006	0.0290443	yes
ENSG00000133119	RFC3	13:33818048-33966558	q1	q2	OK	0	1.01932	inf	#NAME?	0.00015	0.0125941	yes
ENSG00000133466	C1QTNF6	22:37125837-37199385	q1	q2	OK	0	0.581666	inf	#NAME?	0.0004	0.0233114	yes
ENSG00000133794	ARNTL	11:13276651-13387266	q1	q2	OK	0	0.763467	inf	#NAME?	5e-05	0.00542372	yes
ENSG00000134198	TSPAN2	1:115048010-115089500	q1	q2	OK	0	0.412026	inf	#NAME?	0.00125	0.0438119	yes
ENSG00000134668	SPOCD1	1:31789129-31816051	q1	q2	OK	0	0.362597	inf	#NAME?	0.0005	0.0258003	yes
ENSG00000134769	DTNA	18:34493289-34891844	q1	q2	OK	0	0.47555	inf	#NAME?	5e-05	0.00542372	yes
ENSG00000135775	COG2	1:230642488-230693982	q1	q2	OK	0	1.22473	inf	#NAME?	5e-05	0.00542372	yes
ENSG00000135972	MRPS9	2:104936240-105102944	q1	q2	OK	0	3.11408	inf	#NAME?	0.00085	0.0353833	yes
ENSG00000136444	RSAD1	17:50478799-50485975	q1	q2	OK	0	1.15658	inf	#NAME?	0.00015	0.0125941	yes
ENSG00000136827	TOR1A	9:129812943-129824134	q1	q2	OK	0	1.22656	inf	#NAME?	0.00095	0.036958	yes
ENSG00000136856	SLC2A8	9:127397137-127408424	q1	q2	OK	0	0.900658	inf	#NAME?	5e-05	0.00542372	yes
ENSG00000137269	LRRC1	6:53794496-53924121	q1	q2	OK	0	1.88784	inf	#NAME?	5e-05	0.00542372	yes
ENSG00000137507	LRRC32	11:76657055-76670747	q1	q2	OK	0	1.1315	inf	#NAME?	0.00015	0.0125941	yes
ENSG00000138639	ARHGAP24	4:85475113-86002670	q1	q2	OK	0	0.932302	inf	#NAME?	0.0001	0.00984172	yes
ENSG00000138678	GPAT3	4:83535913-83605875	q1	q2	OK	0	0.440011	inf	#NAME?	0.00025	0.0176917	yes
ENSG00000138802	SEC24B	4:109347474-109540896	q1	q2	OK	0	1.00575	inf	#NAME?	5e-05	0.00542372	yes
ENSG00000138942	RNF185	22:31160182-31207019	q1	q2	OK	0	1.05377	inf	#NAME?	5e-05	0.00542372	yes
ENSG00000139531	SUOX	12:55997179-56006641	q1	q2	OK	0	0.512781	inf	#NAME?	0.0005	0.0258003	yes
ENSG00000139620	KANSL2	12:48653400-48682238	q1	q2	OK	0	1.77433	inf	#NAME?	5e-05	0.00542372	yes
ENSG00000140463	BBS4	15:72686178-72738476	q1	q2	OK	0	0.525543	inf	#NAME?	5e-05	0.00542372	yes
ENSG00000140682	TGFB1I1	16:31470203-31477960	q1	q2	OK	0	0.854436	inf	#NAME?	0.00075	0.0334707	yes
ENSG00000141034	GID4	17:18039291-18068404	q1	q2	OK	0	0.731391	inf	#NAME?	0.0004	0.0233114	yes
ENSG00000141425	RPRD1A	18:35984386-36067576	q1	q2	OK	0	1.08408	inf	#NAME?	5e-05	0.00542372	yes
ENSG00000141738	GRB7	17:39737926-39747291	q1	q2	OK	0	1.94743	inf	#NAME?	0.00085	0.0353833	yes
ENSG00000142675	CNKSR1	1:26177402-26189886	q1	q2	OK	0	1.67373	inf	#NAME?	5e-05	0.00542372	yes
ENSG00000143374	TARS2	1:150487363-150507609	q1	q2	OK	0	1.96907	inf	#NAME?	5e-05	0.00542372	yes
ENSG00000143507	DUSP10	1:221701423-221742176	q1	q2	OK	0	1.38326	inf	#NAME?	0.0001	0.00984172	yes
ENSG00000143590	EFNA3	1:155063730-155087538	q1	q2	OK	0	3.14346	inf	#NAME?	5e-05	0.00542372	yes
ENSG00000143847	PPFIA4	1:203026497-203078740	q1	q2	OK	0	0.530806	inf	#NAME?	0.0005	0.0258003	yes
ENSG00000144134	RABL2A	2:113627228-113643396	q1	q2	OK	0	0.629402	inf	#NAME?	0.00015	0.0125941	yes
ENSG00000144354	CDCA7	2:173338218-173368997	q1	q2	OK	0	2.73878	inf	#NAME?	0.0009	0.0364439	yes
ENSG00000144736	SHQ1	3:72749276-72861914	q1	q2	OK	0	0.439774	inf	#NAME?	0.0009	0.0364439	yes
ENSG00000144908	ALDH1L1	3:126103561-126210169	q1	q2	OK	0	0.47921	inf	#NAME?	5e-05	0.00542372	yes
ENSG00000145020	AMT	3:49416777-49422753	q1	q2	OK	0	0.544316	inf	#NAME?	5e-05	0.00542372	yes
ENSG00000145431	PDGFC	4:156760453-156971394	q1	q2	OK	0	1.90596	inf	#NAME?	5e-05	0.00542372	yes
ENSG00000145945	FAM50B	6:3831932-3855737	q1	q2	OK	0	0.834433	inf	#NAME?	0.00075	0.0334707	yes
ENSG00000146143	PRIM2	6:57314804-57646849	q1	q2	OK	0	0.762483	inf	#NAME?	0.00105	0.0391079	yes
ENSG00000146476	ARMT1	6:151452257-151470101	q1	q2	OK	0	1.13978	inf	#NAME?	0.00095	0.036958	yes
ENSG00000146670	CDCA5	11:65066299-65084164	q1	q2	OK	0	1.82894	inf	#NAME?	0.00015	0.0125941	yes
ENSG00000146674	IGFBP3	7:45912244-45921874	q1	q2	OK	0	11.783	inf	#NAME?	5e-05	0.00542372	yes
ENSG00000147381	MAGEA4	X:151904430-151925170	q1	q2	OK	0	3.62966	inf	#NAME?	5e-05	0.00542372	yes
ENSG00000148053	NTRK2	9:84668550-85027070	q1	q2	OK	0	7.20559	inf	#NAME?	5e-05	0.00542372	yes
ENSG00000148399	DPH7	9:137554903-137578935	q1	q2	OK	0	1.90627	inf	#NAME?	5e-05	0.00542372	yes
ENSG00000148803	FUOM	10:133355153-133358035	q1	q2	OK	0	3.02429	inf	#NAME?	5e-05	0.00542372	yes
ENSG00000149577	SIDT2	11:117178732-117197445	q1	q2	OK	0	0.719903	inf	#NAME?	5e-05	0.00542372	yes
ENSG00000150433	TMEM218	11:125096544-125111763	q1	q2	OK	0	1.2731	inf	#NAME?	0.00015	0.0125941	yes
ENSG00000150722	PPP1R1C	2:181954240-182131398	q1	q2	OK	0	3.41242	inf	#NAME?	5e-05	0.00542372	yes
ENSG00000151136	BTBD11	12:107318412-107659642	q1	q2	OK	0	0.818497	inf	#NAME?	0.0001	0.00984172	yes
ENSG00000151835	SACS	13:23328822-23433728	q1	q2	OK	0	0.432305	inf	#NAME?	5e-05	0.00542372	yes
ENSG00000151881	C5orf28	5:43444251-43483893	q1	q2	OK	0	1.12525	inf	#NAME?	0.0004	0.0233114	yes
ENSG00000152413	HOMER1	5:79372635-79514217	q1	q2	OK	0	1.27016	inf	#NAME?	0.0004	0.0233114	yes
ENSG00000153044	CENPH	5:69189547-69210357	q1	q2	OK	0	1.64151	inf	#NAME?	5e-05	0.00542372	yes
ENSG00000153094	BCL2L11	2:111119377-111168447	q1	q2	OK	0	0.716918	inf	#NAME?	0.00015	0.0125941	yes
ENSG00000154359	LONRF1	8:12721893-12756073	q1	q2	OK	0	0.462174	inf	#NAME?	0.0003	0.0196401	yes
ENSG00000154553	PDLIM3	4:185500659-185535612	q1	q2	OK	0	1.15051	inf	#NAME?	0.00015	0.0125941	yes
ENSG00000155903	RASA2	3:141487046-141615342	q1	q2	OK	0	1.04838	inf	#NAME?	0.0005	0.0258003	yes
ENSG00000156795	WDYHV1	8:123416724-123467230	q1	q2	OK	0	3.87814	inf	#NAME?	0.0002	0.0154802	yes
ENSG00000157353	FUK	16:70454420-70480274	q1	q2	OK	0	0.404061	inf	#NAME?	0.0011	0.0401649	yes
ENSG00000158006	PAFAH2	1:25959766-25998157	q1	q2	OK	0	0.518605	inf	#NAME?	0.00105	0.0391079	yes
ENSG00000158089	GALNT14	2:30910466-31155202	q1	q2	OK	0	0.691872	inf	#NAME?	0.00075	0.0334707	yes
ENSG00000158169	FANCC	9:95099053-95317709	q1	q2	OK	0	0.390411	inf	#NAME?	0.00035	0.021763	yes
ENSG00000158290	CUL4B	X:120524608-120575794	q1	q2	OK	0	1.766	inf	#NAME?	5e-05	0.00542372	yes
ENSG00000160867	FGFR4	5:177086885-177098144	q1	q2	OK	0	0.463462	inf	#NAME?	0.0008	0.0345605	yes
ENSG00000161647	MPP3	17:43800798-43833170	q1	q2	OK	0	0.968826	inf	#NAME?	0.00095	0.036958	yes
ENSG00000161692	DBF4B	17:44708607-44752264	q1	q2	OK	0	0.559027	inf	#NAME?	0.00015	0.0125941	yes
ENSG00000162105	SHANK2	11:70467855-71252577	q1	q2	OK	0	0.991404	inf	#NAME?	5e-05	0.00542372	yes
ENSG00000162129	CLPB	11:72292424-72434680	q1	q2	OK	0	5.11252	inf	#NAME?	5e-05	0.00542372	yes
ENSG00000162337	LRP5	11:68312608-68449275	q1	q2	OK	0	0.755249	inf	#NAME?	0.0002	0.0154802	yes
ENSG00000162627	SNX7	1:98661700-98760500	q1	q2	OK	0	0.776562	inf	#NAME?	0.00075	0.0334707	yes
ENSG00000163104	SMARCAD1	4:94207610-94291292	q1	q2	OK	0	0.477094	inf	#NAME?	0.00015	0.0125941	yes
ENSG00000163406	SLC15A2	3:121894088-121944102	q1	q2	OK	0	0.532839	inf	#NAME?	0.00035	0.021763	yes
ENSG00000163482	STK36	2:218663863-218702716	q1	q2	OK	0	0.476188	inf	#NAME?	0.0001	0.00984172	yes
ENSG00000163697	APBB2	4:40810026-41216714	q1	q2	OK	0	0.599348	inf	#NAME?	5e-05	0.00542372	yes
ENSG00000163818	LZTFL1	3:45823315-45916042	q1	q2	OK	0	0.419787	inf	#NAME?	0.0004	0.0233114	yes
ENSG00000164088	PPM1M	3:52245792-52250597	q1	q2	OK	0	1.0575	inf	#NAME?	0.0013	0.0445145	yes
ENSG00000164109	MAD2L1	4:120055607-120416766	q1	q2	OK	0	2.00959	inf	#NAME?	0.0001	0.00984172	yes
ENSG00000164117	FBXO8	4:174236657-174333380	q1	q2	OK	0	1.64748	inf	#NAME?	0.00055	0.0272452	yes
ENSG00000164118	CEP44	4:174236657-174333380	q1	q2	OK	0	0.787845	inf	#NAME?	0.00145	0.0482068	yes
ENSG00000164253	WDR41	5:77210448-77620611	q1	q2	OK	0	1.12828	inf	#NAME?	5e-05	0.00542372	yes
ENSG00000164506	STXBP5	6:146841900-147390476	q1	q2	OK	0	0.345226	inf	#NAME?	5e-05	0.00542372	yes
ENSG00000164930	FZD6	8:103121031-103332866	q1	q2	OK	0	2.86286	inf	#NAME?	0.0003	0.0196401	yes
ENSG00000164953	TMEM67	8:93754843-93819234	q1	q2	OK	0	0.43995	inf	#NAME?	5e-05	0.00542372	yes
ENSG00000165171	WBSCR27	7:73834589-73842535	q1	q2	OK	0	1.15423	inf	#NAME?	0.00115	0.0410821	yes
ENSG00000165238	WNK2	9:93184915-93346414	q1	q2	OK	0	0.738822	inf	#NAME?	0.0001	0.00984172	yes
ENSG00000165240	ATP7A	X:77910655-78050395	q1	q2	OK	0	0.403556	inf	#NAME?	0.0004	0.0233114	yes
ENSG00000165449	SLC16A9	10:59650760-59736002	q1	q2	OK	0	0.761881	inf	#NAME?	0.0003	0.0196401	yes
ENSG00000165821	SALL2	14:21521080-21537216	q1	q2	OK	0	0.478788	inf	#NAME?	0.00125	0.0438119	yes
ENSG00000166289	PLEKHF1	19:29665055-29675457	q1	q2	OK	0	1.14516	inf	#NAME?	0.0003	0.0196401	yes
ENSG00000166313	APBB1	11:6395123-6419414	q1	q2	OK	0	0.460356	inf	#NAME?	0.00015	0.0125941	yes
ENSG00000167380	ZNF226	19:44165072-44178381	q1	q2	OK	0	1.0657	inf	#NAME?	5e-05	0.00542372	yes
ENSG00000167700	MFSD3	8:144509073-144511213	q1	q2	OK	0	0.820582	inf	#NAME?	0.00075	0.0334707	yes
ENSG00000167741	GGT6	17:4556926-4560818	q1	q2	OK	0	1.00998	inf	#NAME?	0.00025	0.0176917	yes
ENSG00000168101	NUDT16L1	16:4693693-4695859	q1	q2	OK	0	0.907621	inf	#NAME?	0.00045	0.0244068	yes
ENSG00000168481	LGI3	8:22146824-22164479	q1	q2	OK	0	0.417964	inf	#NAME?	0.0005	0.0258003	yes
ENSG00000168765	GSTM4	1:109656080-109709551	q1	q2	OK	0	3.53895	inf	#NAME?	5e-05	0.00542372	yes
ENSG00000168936	TMEM129	4:1715951-1721358	q1	q2	OK	0	0.601202	inf	#NAME?	0.001	0.0380077	yes
ENSG00000169016	E2F6	2:11444374-11466177	q1	q2	OK	0	0.902639	inf	#NAME?	5e-05	0.00542372	yes
ENSG00000169071	ROR2	9:91563090-91950162	q1	q2	OK	0	0.987354	inf	#NAME?	0.00015	0.0125941	yes
ENSG00000170113	NIPA1	15:22757856-22829791	q1	q2	OK	0	0.675635	inf	#NAME?	0.00055	0.0272452	yes
ENSG00000170412	GPRC5C	17:74424850-74451653	q1	q2	OK	0	0.477513	inf	#NAME?	0.00085	0.0353833	yes
ENSG00000170454	KRT75	12:52407579-52434525	q1	q2	OK	0	5.58953	inf	#NAME?	0.00075	0.0334707	yes
ENSG00000170631	ZNF16	8:144930357-144950888	q1	q2	OK	0	0.511731	inf	#NAME?	0.00025	0.0176917	yes
ENSG00000170852	KBTBD2	7:32868171-32894131	q1	q2	OK	0	1.22786	inf	#NAME?	0.0002	0.0154802	yes
ENSG00000171161	ZNF672	1:248838209-248849517	q1	q2	OK	0	0.920567	inf	#NAME?	0.00045	0.0244068	yes
ENSG00000171903	CYP4F11	19:15912366-15934867	q1	q2	OK	0	3.31736	inf	#NAME?	0.00085	0.0353833	yes
ENSG00000173226	IQCB1	3:121769762-121835079	q1	q2	OK	0	1.01718	inf	#NAME?	0.00015	0.0125941	yes
ENSG00000173715	C11orf80	11:66744450-66846546	q1	q2	OK	0	1.64697	inf	#NAME?	0.0008	0.0345605	yes
ENSG00000173889	PHC3	3:170086731-170181749	q1	q2	OK	0	0.429914	inf	#NAME?	0.0008	0.0345605	yes
ENSG00000173894	CBX2	17:79778131-79787983	q1	q2	OK	0	0.518778	inf	#NAME?	0.0004	0.0233114	yes
ENSG00000174151	CYB561D1	1:109494051-109502932	q1	q2	OK	0	0.596177	inf	#NAME?	5e-05	0.00542372	yes
ENSG00000174365	SNHG11	20:38446577-38450921	q1	q2	OK	0	0.611908	inf	#NAME?	0.0002	0.0154802	yes
ENSG00000174607	UGT8	4:114598454-114678224	q1	q2	OK	0	0.539729	inf	#NAME?	0.00085	0.0353833	yes
ENSG00000175455	CCDC14	3:123897304-123961408	q1	q2	OK	0	2.18707	inf	#NAME?	5e-05	0.00542372	yes
ENSG00000175707	KDF1	1:26949561-26960406	q1	q2	OK	0	1.02837	inf	#NAME?	0.0014	0.047071	yes
ENSG00000175785	PRIMA1	14:93718297-93788481	q1	q2	OK	0	0.431398	inf	#NAME?	0.0012	0.0423591	yes
ENSG00000177192	PUS1	12:131924735-131945896	q1	q2	OK	0	1.39848	inf	#NAME?	0.001	0.0380077	yes
ENSG00000177614	PGBD5	1:230314481-230425729	q1	q2	OK	0	2.64455	inf	#NAME?	0.0001	0.00984172	yes
ENSG00000177854	TMEM187	X:153972326-153983195	q1	q2	OK	0	0.735961	inf	#NAME?	0.0015	0.0489923	yes
ENSG00000178053	MLF1	3:158571162-158607252	q1	q2	OK	0	2.93737	inf	#NAME?	0.00085	0.0353833	yes
ENSG00000178075	GRAMD1C	3:113828181-113947570	q1	q2	OK	0	0.583534	inf	#NAME?	0.0009	0.0364439	yes
ENSG00000178096	BOLA1	1:149887523-149900798	q1	q2	OK	0	1.97205	inf	#NAME?	0.0003	0.0196401	yes
ENSG00000178162	FAR2P2	2:130416754-130441413	q1	q2	OK	0	0.442405	inf	#NAME?	0.0006	0.0290443	yes
ENSG00000178814	OPLAH	8:144049128-144063832	q1	q2	OK	0	0.378227	inf	#NAME?	0.0013	0.0445145	yes
ENSG00000178966	RMI1	9:83980710-84004074	q1	q2	OK	0	0.704679	inf	#NAME?	0.0005	0.0258003	yes
ENSG00000179409	GEMIN4	17:744413-755336	q1	q2	OK	0	1.23266	inf	#NAME?	5e-05	0.00542372	yes
ENSG00000180626	ZNF594	17:5179535-5191883	q1	q2	OK	0	0.331344	inf	#NAME?	0.00055	0.0272452	yes
ENSG00000180638	SLC47A2	17:19678287-19718979	q1	q2	OK	0	1.3889	inf	#NAME?	0.00025	0.0176917	yes
ENSG00000181135	ZNF707	8:143684451-143713898	q1	q2	OK	0	0.615913	inf	#NAME?	5e-05	0.00542372	yes
ENSG00000181690	PLAG1	8:56160903-56211324	q1	q2	OK	0	0.941812	inf	#NAME?	0.00075	0.0334707	yes
ENSG00000182179	UBA7	3:49805206-49813946	q1	q2	OK	0	0.717485	inf	#NAME?	0.0004	0.0233114	yes
ENSG00000182518	FAM104B	X:55143101-55161310	q1	q2	OK	0	1.66419	inf	#NAME?	0.00095	0.036958	yes
ENSG00000182545	RNASE10	14:20505536-20511169	q1	q2	OK	0	2.70341	inf	#NAME?	0.0014	0.047071	yes
ENSG00000183723	CMTM4	16:66614749-66696707	q1	q2	OK	0	0.762062	inf	#NAME?	5e-05	0.00542372	yes
ENSG00000184232	OAF	11:120210766-120230332	q1	q2	OK	0	1.30209	inf	#NAME?	0.0005	0.0258003	yes
ENSG00000184465	WDR27	6:169457211-169702048	q1	q2	OK	0	2.07343	inf	#NAME?	5e-05	0.00542372	yes
ENSG00000184470	TXNRD2	22:19875516-20016808	q1	q2	OK	0	1.10744	inf	#NAME?	0.0003	0.0196401	yes
ENSG00000184613	NELL2	12:44508274-44921848	q1	q2	OK	0	4.94408	inf	#NAME?	5e-05	0.00542372	yes
ENSG00000184990	SIVA1	14:104753099-104768494	q1	q2	OK	0	6.88488	inf	#NAME?	5e-05	0.00542372	yes
ENSG00000185347	C14orf80	14:105486316-105499575	q1	q2	OK	0	1.77975	inf	#NAME?	0.0011	0.0401649	yes
ENSG00000185686	PRAME	22:22547700-22566602	q1	q2	OK	0	5.94665	inf	#NAME?	0.00045	0.0244068	yes
ENSG00000185716	C16orf52	16:22007479-22092231	q1	q2	OK	0	0.894271	inf	#NAME?	5e-05	0.00542372	yes
ENSG00000185761	ADAMTSL5	19:1505017-1513604	q1	q2	OK	0	0.663894	inf	#NAME?	5e-05	0.00542372	yes
ENSG00000185864	NPIPB4	16:21834568-21919156	q1	q2	OK	0	1.78384	inf	#NAME?	5e-05	0.00542372	yes
ENSG00000186104	CYP2R1	11:14877439-14892252	q1	q2	OK	0	1.04461	inf	#NAME?	5e-05	0.00542372	yes
ENSG00000186523	FAM86B1	8:12178696-12194133	q1	q2	OK	0	0.460743	inf	#NAME?	0.0004	0.0233114	yes
ENSG00000187607	ZNF286A	17:15699576-15749315	q1	q2	OK	0	1.10731	inf	#NAME?	5e-05	0.00542372	yes
ENSG00000187790	FANCM	14:45135939-45200890	q1	q2	OK	0	0.610029	inf	#NAME?	0.00095	0.036958	yes
ENSG00000188312	CENPP	9:92297357-92670265	q1	q2	OK	0	0.957557	inf	#NAME?	0.0013	0.0445145	yes
ENSG00000188343	FAM92A1	8:93213301-93741017	q1	q2	OK	0	0.965139	inf	#NAME?	0.00025	0.0176917	yes
ENSG00000196155	PLEKHG4	16:67277509-67326763	q1	q2	OK	0	0.464498	inf	#NAME?	0.00025	0.0176917	yes
ENSG00000196335	STK31	7:23710166-23832513	q1	q2	OK	0	0.441373	inf	#NAME?	0.00025	0.0176917	yes
ENSG00000196455	PIK3R4	3:130678934-130746829	q1	q2	OK	0	2.71982	inf	#NAME?	5e-05	0.00542372	yes
ENSG00000197172	MAGEA6	X:152766135-152769747	q1	q2	OK	0	3.24578	inf	#NAME?	5e-05	0.00542372	yes
ENSG00000197563	PIGN	18:62043566-62187118	q1	q2	OK	0	0.628229	inf	#NAME?	0.00025	0.0176917	yes
ENSG00000197614	MFAP5	12:8634366-8662888	q1	q2	OK	0	0.942356	inf	#NAME?	0.00105	0.0391079	yes
ENSG00000197847	SLC22A20	11:65213839-65242757	q1	q2	OK	0	0.968498	inf	#NAME?	0.00095	0.036958	yes
ENSG00000198286	CARD11	7:2906140-3043945	q1	q2	OK	0	0.825633	inf	#NAME?	0.00115	0.0410821	yes
ENSG00000198324	FAM109A	12:111360650-111369121	q1	q2	OK	0	0.716943	inf	#NAME?	0.0011	0.0401649	yes
ENSG00000198598	MMP17	12:131828392-131851783	q1	q2	OK	0	1.02153	inf	#NAME?	0.0003	0.0196401	yes
ENSG00000198824	CHAMP1	13:114314512-114327328	q1	q2	OK	0	0.600434	inf	#NAME?	0.00045	0.0244068	yes
ENSG00000198876	DCAF12	9:34084331-34127399	q1	q2	OK	0	2.10095	inf	#NAME?	0.00035	0.021763	yes
ENSG00000198912	C1orf174	1:3889124-3900293	q1	q2	OK	0	1.08608	inf	#NAME?	0.0009	0.0364439	yes
ENSG00000198930	CSAG1	X:152727483-152733735	q1	q2	OK	0	4.92426	inf	#NAME?	0.0013	0.0445145	yes
ENSG00000204179	PTPN20	10:46911395-47002488	q1	q2	OK	0	0.595783	inf	#NAME?	5e-05	0.00542372	yes
ENSG00000204344	STK19	6:31969809-32003521	q1	q2	OK	0	0.857741	inf	#NAME?	0.00035	0.021763	yes
ENSG00000205423	CNEP1R1	16:50024409-50037088	q1	q2	OK	0	1.18829	inf	#NAME?	5e-05	0.00542372	yes
ENSG00000205571	SMN2	5:70049611-70078522	q1	q2	OK	0	0.335047	inf	#NAME?	0.0003	0.0196401	yes
ENSG00000206077	ZDHHC11B	5:710359-766952	q1	q2	OK	0	0.599822	inf	#NAME?	0.00095	0.036958	yes
ENSG00000213339	QTRT1	19:10701429-10713437	q1	q2	OK	0	1.86969	inf	#NAME?	0.0009	0.0364439	yes
ENSG00000213366	GSTM2	1:109656080-109709551	q1	q2	OK	0	11.0363	inf	#NAME?	5e-05	0.00542372	yes
ENSG00000213401	MAGEA12	X:152733778-152740985	q1	q2	OK	0	2.10204	inf	#NAME?	0.00085	0.0353833	yes
ENSG00000213762	ZNF134	19:57614232-57624723	q1	q2	OK	0	0.699008	inf	#NAME?	0.00045	0.0244068	yes
ENSG00000213930	GALT	9:34638132-34681298	q1	q2	OK	0	2.10852	inf	#NAME?	5e-05	0.00542372	yes
ENSG00000214357	NEURL1B	5:172641265-172697720	q1	q2	OK	0	0.559526	inf	#NAME?	0.00115	0.0410821	yes
ENSG00000214787	MS4A4E	11:60201252-60243088	q1	q2	OK	0	0.674879	inf	#NAME?	0.0011	0.0401649	yes
ENSG00000214856	KRT16P1	17:18432050-18442895	q1	q2	OK	0	2.26763	inf	#NAME?	5e-05	0.00542372	yes
ENSG00000215386	MIR99AHG	21:16070521-16627397	q1	q2	OK	0	1.00486	inf	#NAME?	0.0002	0.0154802	yes
ENSG00000221867	MAGEA3	X:152698751-152702347	q1	q2	OK	0	4.16648	inf	#NAME?	0.0002	0.0154802	yes
ENSG00000234444	ZNF736	7:64307458-64354860	q1	q2	OK	0	0.440198	inf	#NAME?	0.0003	0.0196401	yes
ENSG00000240344	PPIL3	2:200870906-200889303	q1	q2	OK	0	2.31776	inf	#NAME?	5e-05	0.00542372	yes
ENSG00000242802	AP5Z1	7:4775621-4794312	q1	q2	OK	0	1.31577	inf	#NAME?	0.0015	0.0489923	yes
ENSG00000243716	NPIPB5	16:22345935-22536521	q1	q2	OK	0	2.26054	inf	#NAME?	5e-05	0.00542372	yes
ENSG00000253161	LINC01605	8:37421340-37554183	q1	q2	OK	0	1.29268	inf	#NAME?	0.00045	0.0244068	yes
ENSG00000256269	HMBS	11:119084865-119093549	q1	q2	OK	0	1.73041	inf	#NAME?	5e-05	0.00542372	yes
ENSG00000269335	IKBKG	X:154531390-154565046	q1	q2	OK	0	1.44501	inf	#NAME?	0.00135	0.0459093	yes
ENSG00000276550	HERC2P2	15:22495569-22590815	q1	q2	OK	0	0.49017	inf	#NAME?	0.0002	0.0154802	yes
ENSG00000282508	LINC01002	19:197309-239440	q1	q2	OK	0	2.37659	inf	#NAME?	5e-05	0.00542372	yes
